# Supplementary material for: Genetic characterization of outbred Sprague Dawley rats and utility for genome-wide association studies
Source: PLOS journal article supplement (doi:10.1371/journal.pgen.1010234), 2022-05-31

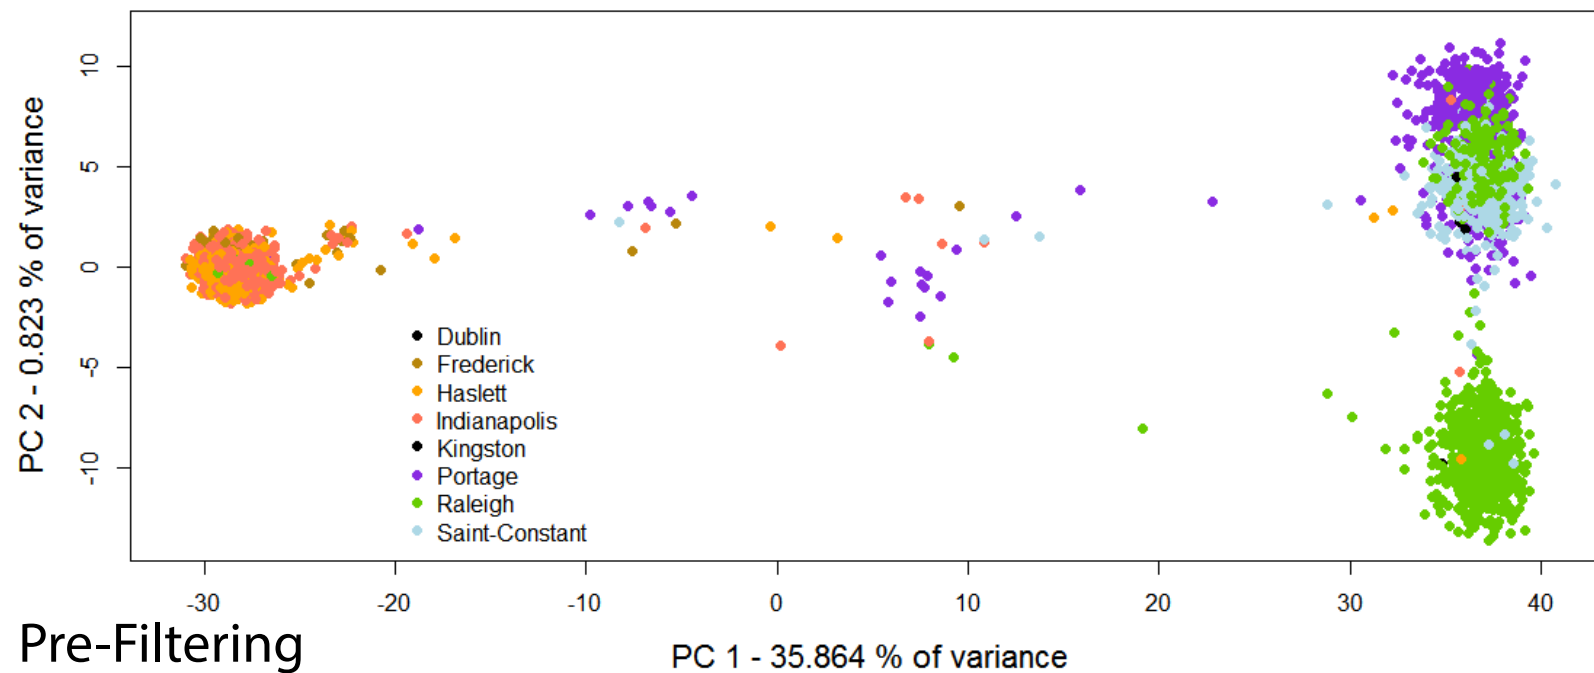

## Post-Filtering

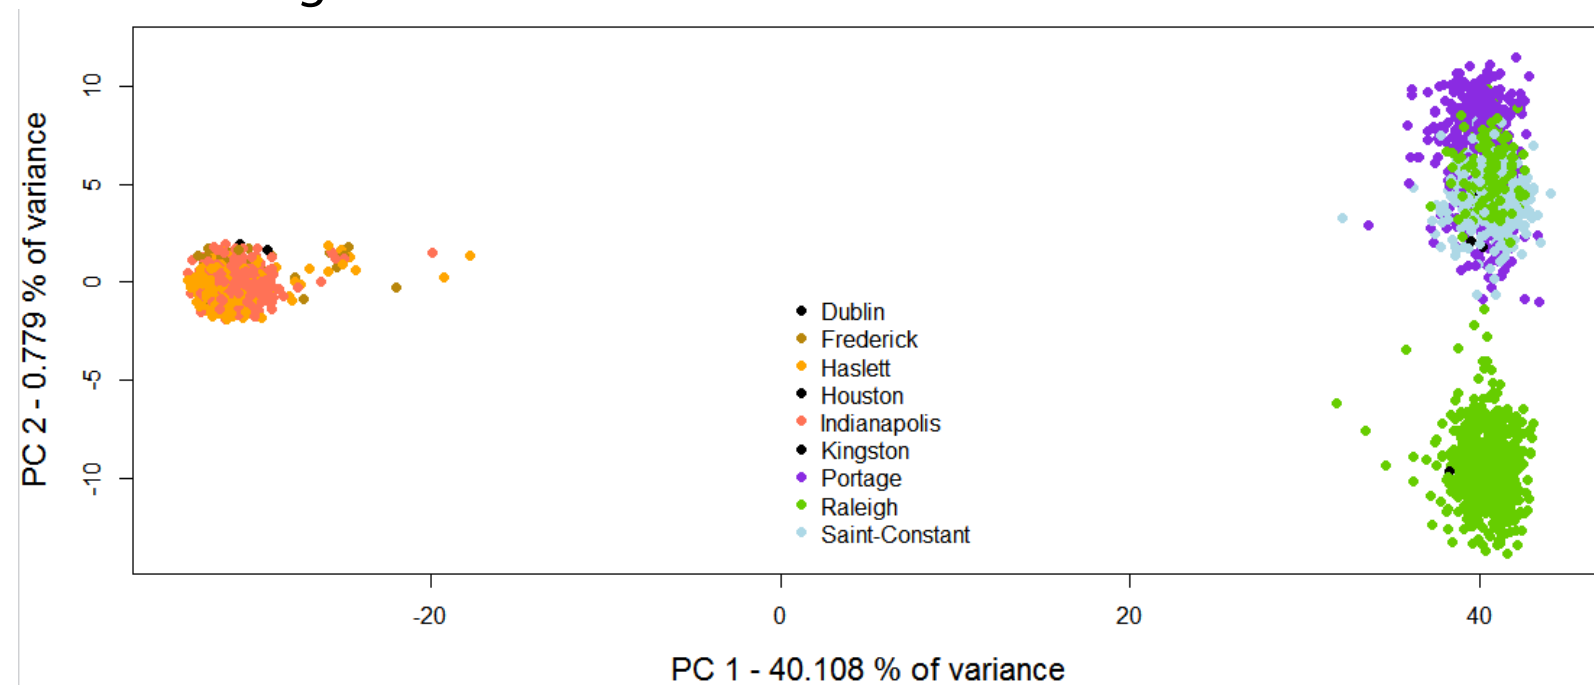

Supplement: S7 (10.1371/journal.pgen.1010234.s007) [file journal.pgen.1010234.s007]
